# Supplementary material for: Long‐Term Outcomes of Cardiac Resynchronization Therapy Using Apical Versus Nonapical Left Ventricular Pacing
Source: PubMed Central journal article supplement — J Am Heart Assoc. 2018 Aug 14;7(16):e008508. doi: 10.1161/JAHA.117.008508 (PMC6201398; doi:10.1161/jaha.117.008508), 2018-08-14
Supplement: JAH3-7-e008508-s001.pdf [file JAH3-7-e008508-s001.pdf]

# **SUPPLEMENTAL MATERIAL**

**Figure S1.** Clinical outcomes after cardiac resynchronization therapy according to lead position.

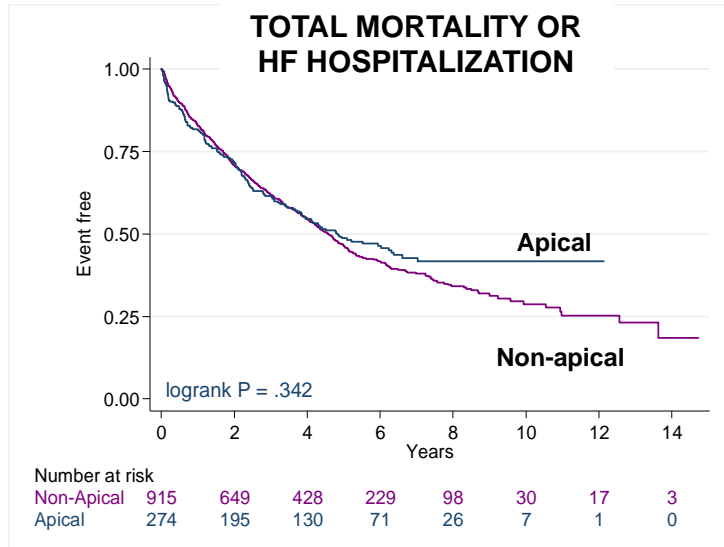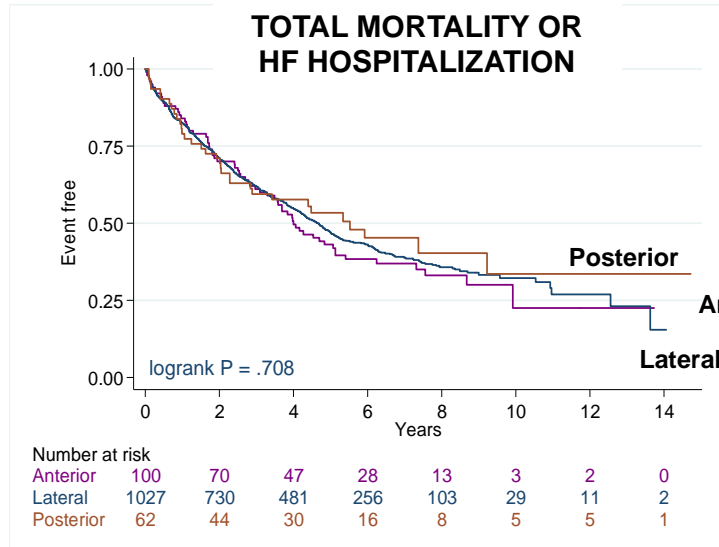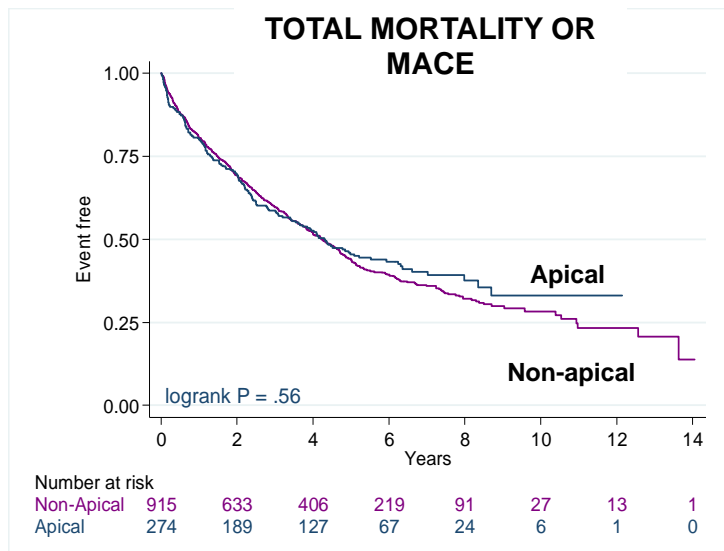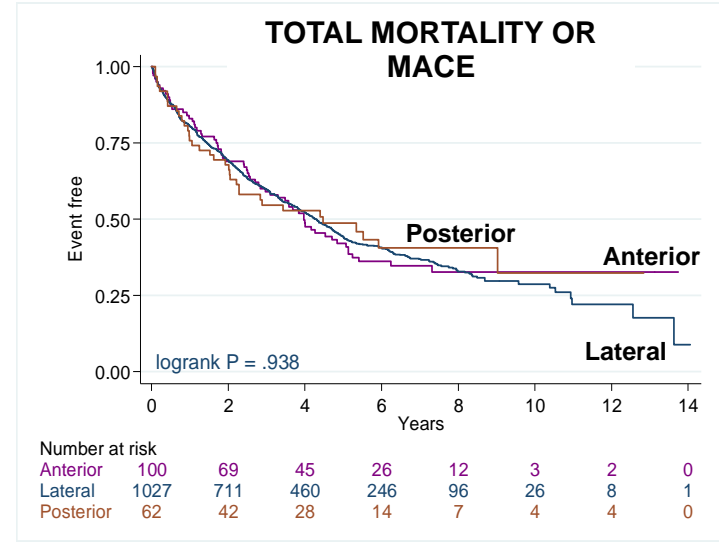

Kaplan-Meier survival curves for clinical outcomes after CRT. MACE = major adverse cardiac events.

**Figure S2.** Mode of death according to left ventricular lead position.

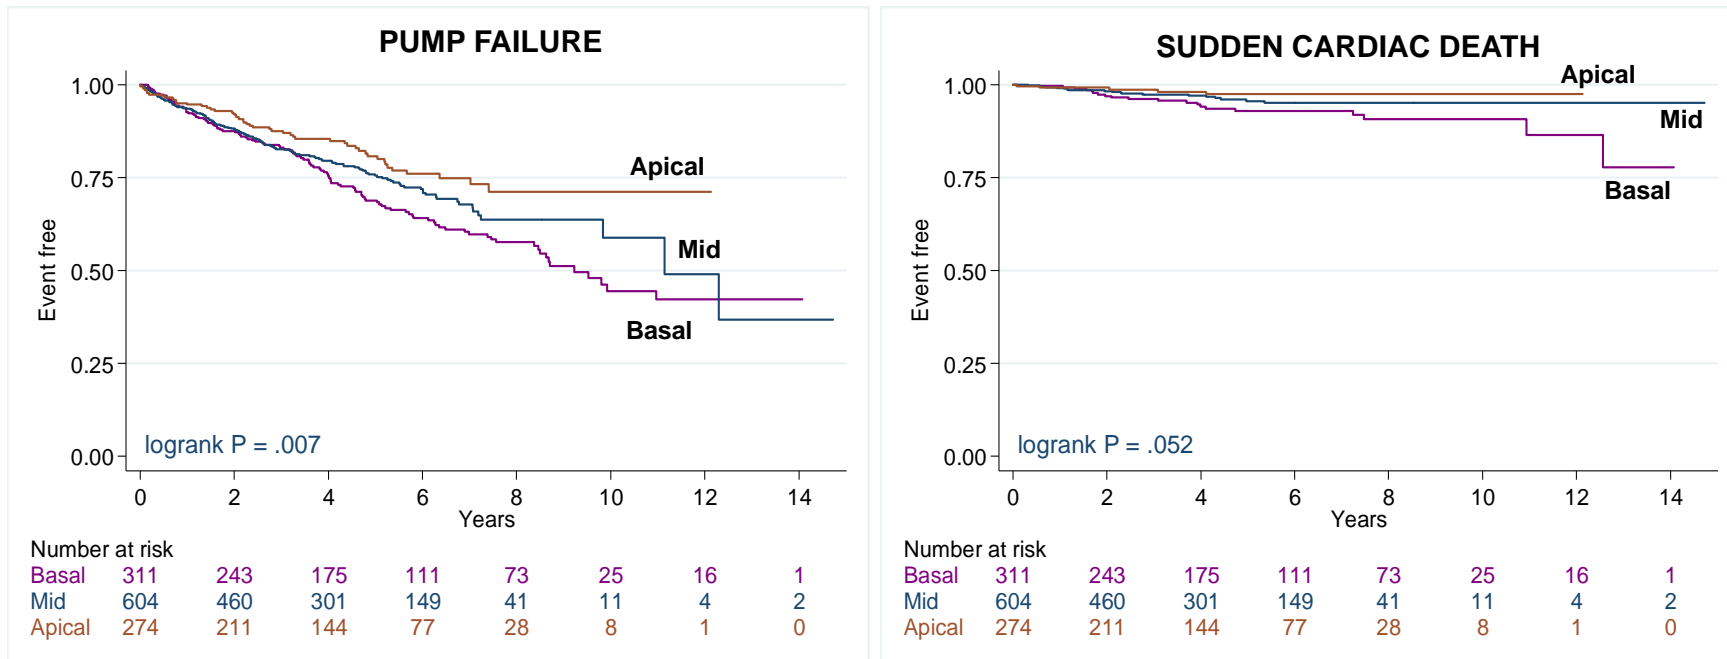

Kaplan-Meier survival curves for clinical outcomes after CRT according to longitudinal lead position.

**Figure S3.** Mode of death according to left ventricular lead position: competing risks.

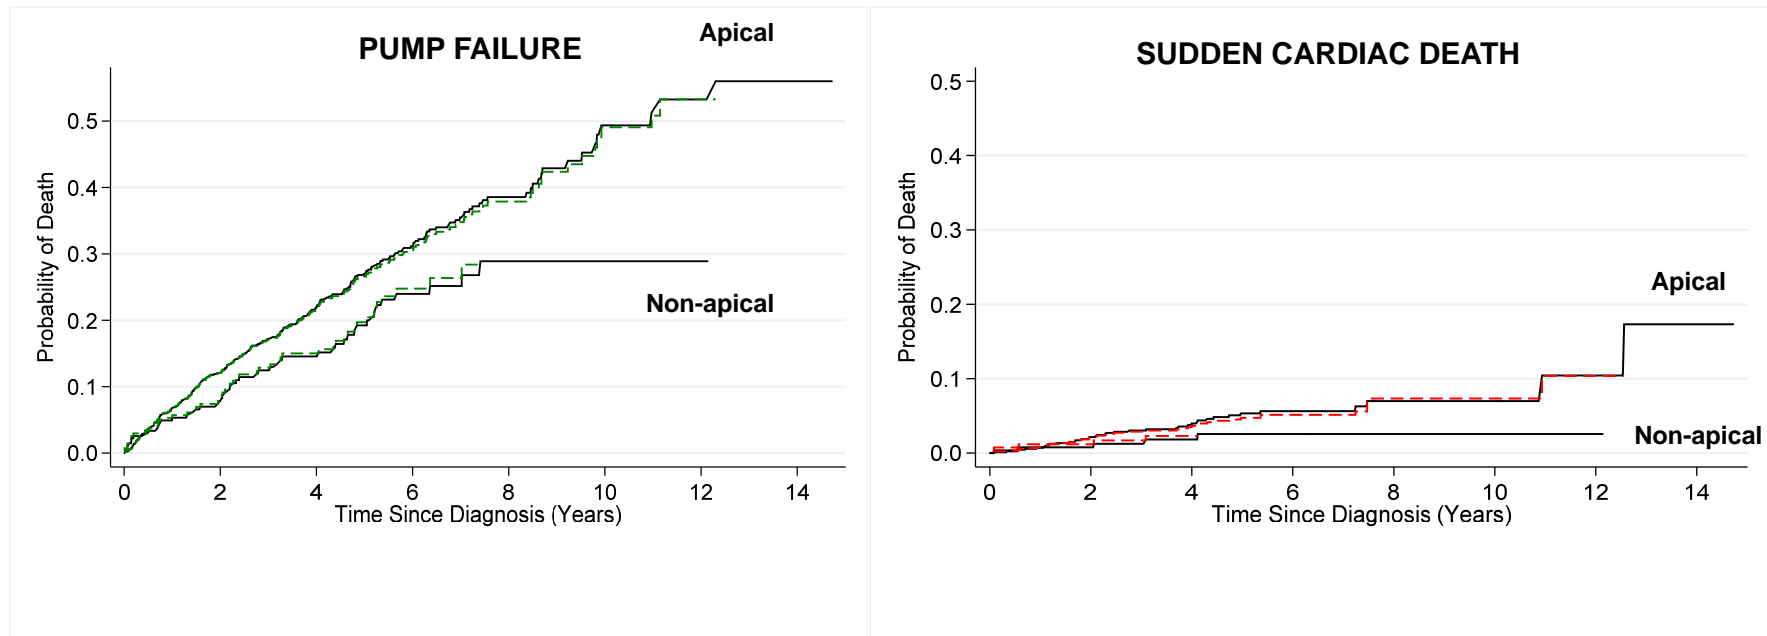

Kaplan-Meier survival curves for clinical outcomes after CRT using competing risk analysis. Mid and basal LV lead positions were grouped together. Solid lines refer to Kaplan-Meier survival estimates for the clinical endpoint. Dashed lines refer to Kaplan-Meier survival estimates using competing risks.
